# Supplementary material for: Exploring the possible role of satellite-based rainfall data in estimating inter- and intra-annual global rainfall erosivity
Source: Copernicus journal article supplement (doi:10.5194/hess-26-1907-2022), 2022-04-14
Supplement: Supplementary file 1 [file hess-26-1907-2022-supplement.pdf]

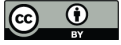

*Supplement of*

## **Exploring the possible role of satellite-based rainfall data in estimating inter- and intra-annual global rainfall erosivity**

**Nejc Bezak et al.**

*Correspondence to:* Nejc Bezak ([nejc.bezak@fgg.uni-lj.si](mailto:nejc.bezak@fgg.uni-lj.si))

The copyright of individual parts of the supplement might differ from the article licence.

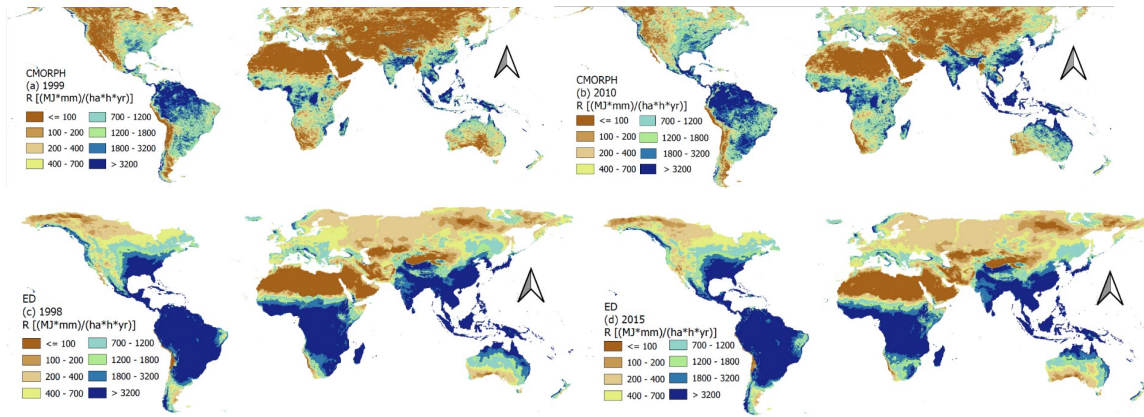

5 **Figure S1: Annual rainfall erosivity extreme years. Maximum (a) and minimum (b) for the CMORPH; maximum (c) and minimum (d) for the ED.**

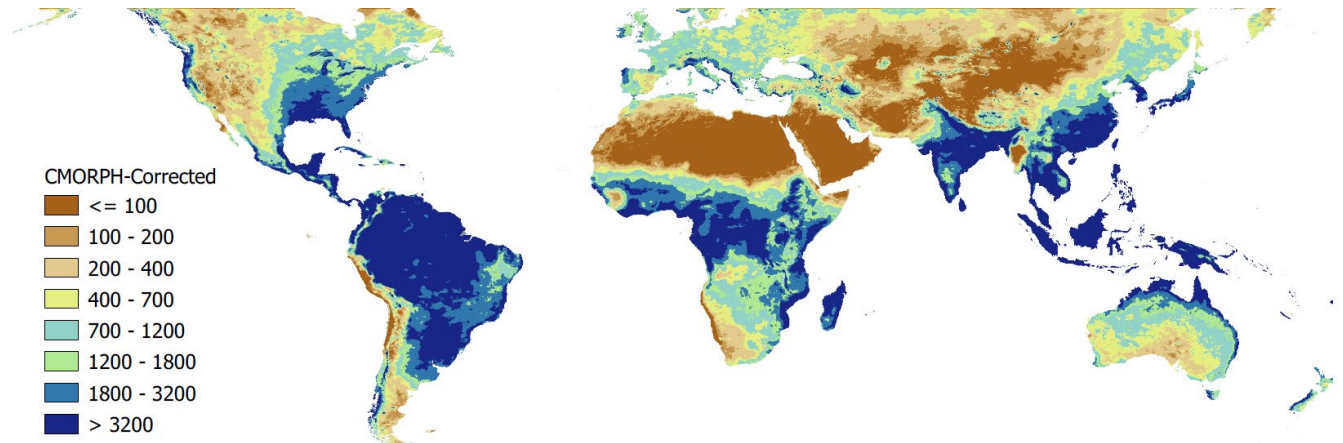

**Figure S2: Corrected global rainfall erosivity map (CMORPH<sub>COR</sub>) [(MJ\*mm)/(ha\*h\*yr)] based on the CMORPH data with the consideration of the GloREDA for the 1998-2019 period and using information for 5 climate zones.**

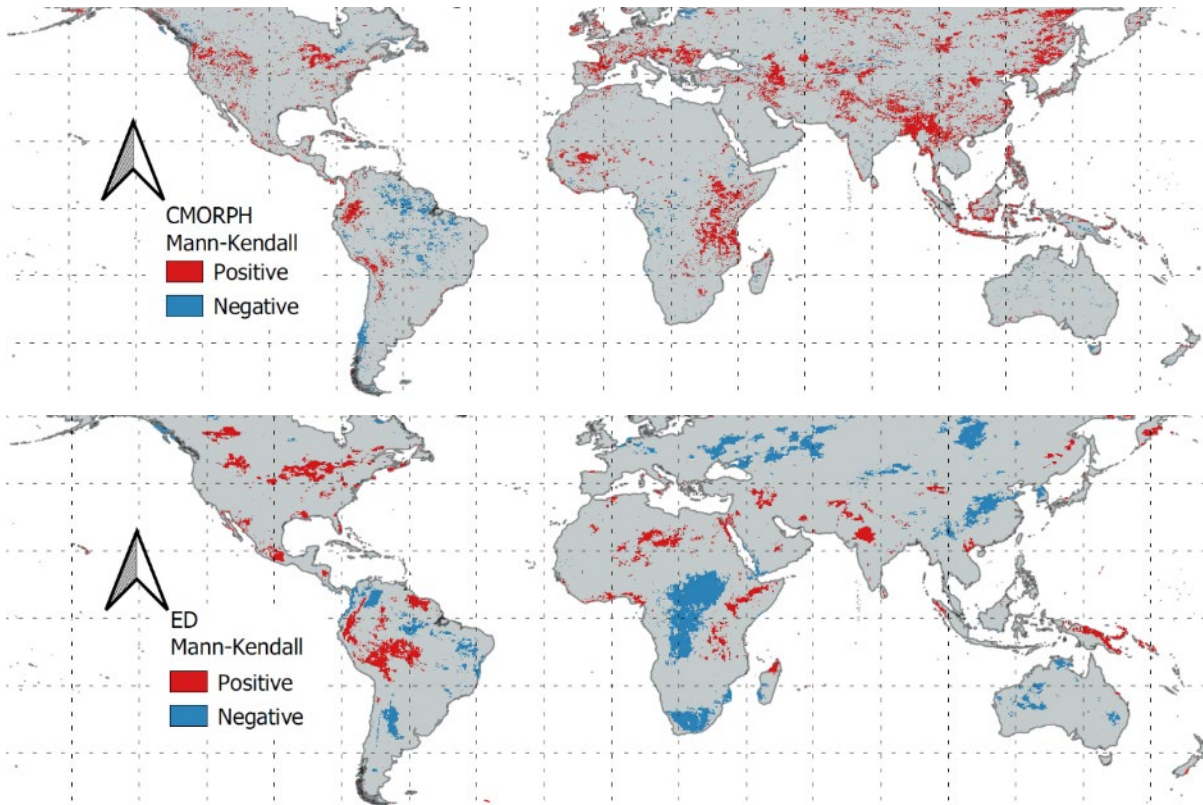

Figure S3: Statistically significant (0.05 significance level) Mann-Kendall trend results using annual rainfall erosivity values for all grid cells covered by CMORPH (1998-2019). Statistically significant trend results using CMORPH and ED concept are shown. Non-significant results were not shown. Dotted lines indicate longitude and latitude lines separated by 20 degrees.

15
